# Supplementary material
Source: publisher figshare collection journal article supplement (https://tandf.figshare.com/ndownloader/files/30927076)
Supplement: Supplementary file 2 [file 30927076]

**Supplement to**  
**“A Matrix-free Likelihood Method for Exploratory Factor Analysis of**  
**High-dimensional Gaussian Data”**

**Fan Dai, Somak Dutta and Ranjan Maitra**

## **S1 Supplementary materials for Methodology**

### **S1.1 The EM algorithm for factor analysis on Gaussian data**

The complete data log-likelihood function is

$$\begin{aligned}\ell_C(\boldsymbol{\mu}, \boldsymbol{\Lambda}, \boldsymbol{\Psi}) &= c - \frac{n}{2} \log \det \boldsymbol{\Psi} - \frac{1}{2} \sum_{i=1}^n \{(\mathbf{Y}_i - \boldsymbol{\mu} - \boldsymbol{\Lambda} \mathbf{Z}_i)^\top \boldsymbol{\Psi}^{-1} (\mathbf{Y}_i - \boldsymbol{\mu} - \boldsymbol{\Lambda} \mathbf{Z}_i)\} \\ &= c - \frac{n}{2} \log \det \boldsymbol{\Psi} - \frac{1}{2} \text{Tr} \left\{ \boldsymbol{\Psi}^{-1} \sum_{i=1}^n (\mathbf{Y}_i - \boldsymbol{\mu})(\mathbf{Y}_i - \boldsymbol{\mu})^\top - 2 \boldsymbol{\Psi}^{-1} \boldsymbol{\Lambda} \sum_{i=1}^n \mathbf{Z}_i (\mathbf{Y}_i - \boldsymbol{\mu})^\top \right\} \\ &\quad - \frac{1}{2} \text{Tr} \left\{ \boldsymbol{\Lambda}^\top \boldsymbol{\Psi}^{-1} \boldsymbol{\Lambda} \sum_{i=1}^n \mathbf{Z}_i \mathbf{Z}_i^\top \right\},\end{aligned}\tag{S1}$$

where  $c$  is a constant that does not depend on the parameters.

#### **S1.1.1 E-Step computations**

Since the ML estimate of  $\boldsymbol{\mu}$  is  $\bar{\mathbf{Y}}$ , at the current estimates  $\boldsymbol{\Lambda}_t$  and  $\boldsymbol{\Psi}_t$ , the expected complete log-likelihood or so called Q function is given by

$$\begin{aligned}Q(\boldsymbol{\Lambda}_{t+1}, \boldsymbol{\Psi}_{t+1} | \bar{\mathbf{Y}}, \boldsymbol{\Lambda}_t, \boldsymbol{\Psi}_t) &= \mathbb{E}[\ell_C(\boldsymbol{\Lambda}, \boldsymbol{\Psi} | \mathbf{Y}, \boldsymbol{\Lambda}_t, \boldsymbol{\Psi}_t)] \\ &= -\frac{n}{2} \log \det \boldsymbol{\Psi} - \frac{n}{2} \text{Tr} \boldsymbol{\Psi}^{-1} \mathbf{S} - \text{Tr} \left\{ \boldsymbol{\Psi}^{-1} \boldsymbol{\Lambda} \sum_{i=1}^n \mathbb{E}[\mathbf{Z}_i | \mathbf{Y}, \boldsymbol{\Lambda}_t, \boldsymbol{\Psi}_t] (\mathbf{Y}_i - \bar{\mathbf{Y}})^\top \right\} \\ &\quad + \frac{1}{2} \text{Tr} \left\{ \boldsymbol{\Lambda}^\top \boldsymbol{\Psi}^{-1} \boldsymbol{\Lambda} \frac{1}{n} \sum_{i=1}^n \mathbb{E}[\mathbf{Z}_i \mathbf{Z}_i^\top | \mathbf{Y}, \boldsymbol{\Lambda}_t, \boldsymbol{\Psi}_t] \right\}.\end{aligned}\tag{S2}$$

Since  $\mathbf{Z}_i | \mathbf{Y}, \boldsymbol{\Lambda}_t, \boldsymbol{\Psi}_t \sim \mathcal{N}_q(\boldsymbol{\Lambda}_t^\top \boldsymbol{\Sigma}_t^{-1} (\mathbf{Y}_i - \bar{\mathbf{Y}}), (\mathbf{I}_q + \boldsymbol{\Lambda}_t^\top \boldsymbol{\Psi}_t^{-1} \boldsymbol{\Lambda}_t)^{-1})$ . Then,

$$\mathbb{E}[\mathbf{Z}_i | \mathbf{Y}, \boldsymbol{\Lambda}_t, \boldsymbol{\Psi}_t] = \boldsymbol{\Lambda}_t^\top \boldsymbol{\Sigma}_t^{-1} (\mathbf{Y}_i - \bar{\mathbf{Y}})\tag{S3}$$

and

$$\begin{aligned} E[\mathbf{Z}_i \mathbf{Z}_i^\top | \mathbf{Y}, \mathbf{\Lambda}_t, \mathbf{\Psi}_t] &= \text{Var}[\mathbf{Z}_i | \mathbf{Y}, \mathbf{\Lambda}_t, \mathbf{\Psi}_t] + E[\mathbf{Z}_i | \mathbf{Y}, \mathbf{\Lambda}_t, \mathbf{\Psi}_t] E[\mathbf{Z}_i^\top | \mathbf{Y}_i, \bar{\mathbf{Y}}, \mathbf{\Lambda}_t, \mathbf{\Psi}_t] \\ &= (\mathbf{I}_q + \mathbf{\Lambda}_t^\top \mathbf{\Psi}_t^{-1} \mathbf{\Lambda}_t)^{-1} + \mathbf{\Lambda}_t^\top \mathbf{\Sigma}_t^{-1} (\mathbf{Y}_i - \bar{\mathbf{Y}}) (\mathbf{Y}_i - \bar{\mathbf{Y}})^\top \mathbf{\Sigma}_t^{-1} \mathbf{\Lambda}_t. \end{aligned} \quad (\text{S4})$$

### S1.1.2 M-Step computations

The parameters  $\mathbf{\Lambda}_{t+1}$  and  $\mathbf{\Psi}_{t+1}$  are obtained by maximizing  $Q(\mathbf{\Lambda}_{t+1}, \mathbf{\Psi}_{t+1} | \bar{\mathbf{Y}}, \mathbf{\Lambda}_t, \mathbf{\Psi}_t)$  following equation S2. Specifically, given  $\mathbf{Y}$ ,  $\mathbf{\Lambda}_t$  and  $\mathbf{\Psi}_t$ , the maximizer  $\mathbf{\Lambda}_{t+1}$  is given by

$$\begin{aligned} \hat{\mathbf{\Lambda}}_{t+1} &= \left( \frac{1}{n} \sum_{i=1}^n (\mathbf{Y}_i - \bar{\mathbf{Y}}) E[\mathbf{Z}_i^\top | \mathbf{Y}, \mathbf{\Lambda}_t, \mathbf{\Psi}_t] \right) \left( \frac{1}{n} \sum_{i=1}^n E[\mathbf{Z}_i \mathbf{Z}_i^\top | \mathbf{Y}, \mathbf{\Lambda}_t, \mathbf{\Psi}_t] \right)^{-1} \\ &= \mathbf{S} \mathbf{\Sigma}_t^{-1} \mathbf{\Lambda}_t ((\mathbf{I}_q + \mathbf{\Lambda}_t^\top \mathbf{\Psi}_t^{-1} \mathbf{\Lambda}_t)^{-1} + \mathbf{\Lambda}_t^\top \mathbf{\Sigma}_t^{-1} \mathbf{S} \mathbf{\Sigma}_t^{-1} \mathbf{\Lambda}_t)^{-1} \end{aligned} \quad (\text{S5})$$

where  $\mathbf{\Sigma}_t = \mathbf{\Lambda}_t \mathbf{\Lambda}_t^\top + \mathbf{\Psi}_t$ . By Woodbury matrix identity (Henderson and Searle, 1981),  $\mathbf{\Sigma}_t^{-1} \mathbf{\Lambda}_t = \mathbf{\Psi}_t^{-1} \mathbf{\Lambda}_t (\mathbf{I}_q + \mathbf{\Lambda}_t^\top \mathbf{\Psi}_t^{-1} \mathbf{\Lambda}_t)^{-1}$ , so S5 can be simplified as

$$\begin{aligned} \hat{\mathbf{\Lambda}}_{t+1} &= \mathbf{S} \mathbf{\Psi}_t^{-1} \mathbf{\Lambda}_t (\mathbf{I}_q + \mathbf{\Lambda}_t^\top \mathbf{\Psi}_t^{-1} \mathbf{\Lambda}_t)^{-1} ((\mathbf{I}_q + \mathbf{\Lambda}_t^\top \mathbf{\Psi}_t^{-1} \mathbf{\Lambda}_t)^{-1} + \mathbf{\Lambda}_t^\top \mathbf{\Sigma}_t^{-1} \mathbf{S} \mathbf{\Psi}_t^{-1} \mathbf{\Lambda}_t (\mathbf{I}_q + \mathbf{\Lambda}_t^\top \mathbf{\Psi}_t^{-1} \mathbf{\Lambda}_t)^{-1})^{-1} \\ &= \mathbf{S} \mathbf{\Psi}_t^{-1} \mathbf{\Lambda}_t (\mathbf{I}_q + \mathbf{\Lambda}_t^\top \mathbf{\Sigma}_t^{-1} \mathbf{S} \mathbf{\Psi}_t^{-1} \mathbf{\Lambda}_t)^{-1}. \end{aligned} \quad (\text{S6})$$

Next, given  $\mathbf{Y}$ ,  $\mathbf{\Lambda}_t$ ,  $\mathbf{\Psi}_t$  and  $\hat{\mathbf{\Lambda}}_{t+1}$ , the ML estimate of  $\mathbf{\Psi}_{t+1}$  is given by

$$\begin{aligned} \hat{\mathbf{\Psi}}_{t+1} &= \text{diag} \left( \mathbf{S} - \frac{2}{n} \sum_{i=1}^n (\mathbf{Y}_i - \bar{\mathbf{Y}}) E[\mathbf{Z}_i^\top | \mathbf{Y}, \mathbf{\Lambda}_t, \mathbf{\Psi}_t] \hat{\mathbf{\Lambda}}_{t+1}^\top \right. \\ &\quad \left. + \hat{\mathbf{\Lambda}}_{t+1} \frac{1}{n} \sum_{i=1}^n E[\mathbf{Z}_i \mathbf{Z}_i^\top | \mathbf{Y}, \mathbf{\Lambda}_t, \mathbf{\Psi}_t]^{-1} \hat{\mathbf{\Lambda}}_{t+1}^\top \right). \end{aligned} \quad (\text{S7})$$

Substitute with S5, we get

$$\begin{aligned} \hat{\mathbf{\Psi}}_{t+1} &= \text{diag} \left( \mathbf{S} - \frac{2}{n} \sum_{i=1}^n (\mathbf{Y}_i - \bar{\mathbf{Y}}) E[\mathbf{Z}_i^\top | \mathbf{Y}, \mathbf{\Lambda}_t, \mathbf{\Psi}_t] \hat{\mathbf{\Lambda}}_{t+1}^\top \right. \\ &\quad \left. + \frac{1}{n} \sum_{i=1}^n (\mathbf{Y}_i - \bar{\mathbf{Y}}) E[\mathbf{Z}_i^\top | \mathbf{Y}, \mathbf{\Lambda}_t, \mathbf{\Psi}_t] \hat{\mathbf{\Lambda}}_{t+1}^\top \right) \\ &= \text{diag} \left( \mathbf{S} - 2 \mathbf{S} \mathbf{\Sigma}_t^{-1} \mathbf{\Lambda}_t \hat{\mathbf{\Lambda}}_{t+1}^\top \right). \end{aligned} \quad (\text{S8})$$

## S1.2 Proof of Lemma 1

From equation 1, the ML estimates of  $\Lambda$  and  $\Psi$  are obtained by solving the score equations

$$\begin{cases} \Lambda(\mathbf{I}_q + \Lambda^\top \Psi^{-1} \Lambda) = \mathbf{S} \Psi^{-1} \Lambda \\ \Psi = \text{diag}(\mathbf{S} - \Lambda \Lambda^\top) \end{cases} \quad (\text{S9})$$

From  $\Lambda(\mathbf{I}_q + \Lambda^\top \Psi^{-1} \Lambda) = \mathbf{S} \Psi^{-1} \Lambda$ , we have

$$\Psi^{-1/2} \Lambda(\mathbf{I}_q + (\Psi^{-1/2} \Lambda)^\top \Psi^{-1/2} \Lambda) = \Psi^{-1/2} \mathbf{S} \Psi^{-1/2} \Psi^{-1/2} \Lambda. \quad (\text{S10})$$

Suppose that  $\Psi^{-1/2} \mathbf{S} \Psi^{-1/2} = \mathbf{V} \mathbf{D} \mathbf{V}^\top$  and that the diagonal elements in  $\mathbf{D}$  are in decreasing order with  $\theta_1 \geq \theta_2 \geq \dots \geq \theta_p$ . Let  $\mathbf{D} = \begin{bmatrix} \mathbf{D}_q & 0 \\ 0 & \mathbf{D}_m \end{bmatrix}$  with  $m = p - q$  and  $\mathbf{D}_q$  containing the largest  $q$  eigenvalues  $\theta_1 \geq \theta_2 \geq \dots \geq \theta_q$ . The corresponding  $q$  eigenvectors forms columns of matrix  $\mathbf{V}_q$  so that  $\mathbf{V} = [\mathbf{V}_q, \mathbf{V}_m]$ . Then, if  $\mathbf{D}_q > \mathbf{I}_q$ , S10 shows that

$$\Lambda = \Psi^{1/2} \mathbf{V}_q (\mathbf{D}_q - \mathbf{I}_q)^{1/2}. \quad (\text{S11})$$

The square roots of  $\theta_1, \dots, \theta_q$  are the  $q$  largest singular values of  $n^{-1/2}(\mathbf{Y} - \mathbf{1} \bar{\mathbf{Y}}^\top) \Psi^{-1/2}$  and columns in  $\mathbf{V}_q$  are then the corresponding  $q$  right-singular vectors. Hence, conditional on  $\Psi$ ,  $\Lambda$  is maximized at  $\hat{\Lambda} = \Psi^{1/2} \mathbf{V}_q \Delta$ , where  $\Delta$  is a diagonal matrix with elements  $\max(\theta_i - 1, 0)^{1/2}$ ,  $i = 1, \dots, q$ .

From the construction of  $\mathbf{V}_q$  and  $\mathbf{V}_m$ , we have  $\mathbf{V}_q^\top \mathbf{V}_q = \mathbf{I}_q$ ,  $\mathbf{V}_m^\top \mathbf{V}_m = \mathbf{I}_m$ ,  $\mathbf{V}_q \mathbf{V}_q^\top + \mathbf{V}_m \mathbf{V}_m^\top = \mathbf{I}_p$ ,  $\mathbf{V}_q^\top \mathbf{V}_m = \mathbf{0}$  and hence,  $(\mathbf{V}_q \mathbf{D}_q \mathbf{V}_q^\top + \mathbf{V}_m \mathbf{V}_m^\top)(\mathbf{V}_q \mathbf{D}_q^{-1} \mathbf{V}_q^\top + \mathbf{V}_m \mathbf{V}_m^\top) = \mathbf{I}_p$ .

Let  $\mathbf{A} = \mathbf{V}_q \Delta^2 \mathbf{V}_q^\top$ . Then  $\mathbf{A} \mathbf{A} = \mathbf{V}_q \Delta^4 \mathbf{V}_q^\top$  and

$$\begin{aligned} |\mathbf{A} + \mathbf{I}_p| &= |(\mathbf{A} + \mathbf{I}_p) \mathbf{A}| / |\mathbf{A}| \\ &= |\mathbf{V}_q (\Delta^4 + \Delta^2) \mathbf{V}_q^\top| / |\mathbf{V}_q \Delta^2 \mathbf{V}_q^\top| \\ &= |\Delta^2 + \mathbf{I}_q| = \prod_{j=1}^q \theta_j \end{aligned} \quad (\text{S12})$$

and

$$\begin{aligned} (\mathbf{A} + \mathbf{I}_p)^{-1} &= (\mathbf{V}_q \Delta^2 \mathbf{V}_q^\top + \mathbf{V}_q \mathbf{V}_q^\top + \mathbf{V}_m \mathbf{V}_m^\top)^{-1} \\ &= (\mathbf{V}_q (\Delta^2 + \mathbf{I}_q) \mathbf{V}_q^\top + \mathbf{V}_m \mathbf{V}_m^\top)^{-1} \\ &= (\mathbf{V}_q \mathbf{D}_q \mathbf{V}_q^\top + \mathbf{V}_m \mathbf{V}_m^\top)^{-1} \\ &= \mathbf{V}_q \mathbf{D}_q^{-1} \mathbf{V}_q^\top + \mathbf{V}_m \mathbf{V}_m^\top. \end{aligned} \quad (\text{S13})$$

Based on S12 and S13 and equation 2, the profile log-likelihood is given by

$$\begin{aligned}
\ell_p(\Psi) &= c - \frac{n}{2} \log |\hat{\Lambda} \hat{\Lambda}^\top + \Psi| - \frac{n}{2} \text{Tr} (\hat{\Lambda} \hat{\Lambda}^\top + \Psi)^{-1} \mathbf{S} \\
&= c - \frac{n}{2} \left\{ \log |\Psi^{1/2} (\mathbf{V}_q \Delta^2 \mathbf{V}_q^\top + \mathbf{I}_p) \Psi^{1/2}| + \text{Tr} \Psi^{1/2} (\mathbf{V}_q \Delta^2 \mathbf{V}_q^\top + \mathbf{I}_p) \Psi^{1/2})^{-1} \mathbf{S} \right\} \\
&= c - \frac{n}{2} \left\{ \log \det \Psi + \log |\mathbf{V}_q \Delta^2 \mathbf{V}_q^\top + \mathbf{I}_p| + \text{Tr} (\mathbf{V}_q \mathbf{D}_q^{-1} \mathbf{V}_q^\top + \mathbf{V}_m \mathbf{V}_m^\top) \Psi^{-1/2} \mathbf{S} \Psi^{-1/2} \right\} \\
&= c - \frac{n}{2} \left\{ \log \det \Psi + \sum_{j=1}^q \log \theta_j + \text{Tr} (\mathbf{D}_q^{-1} \mathbf{V}_q^\top \mathbf{V} \mathbf{D} \mathbf{V}^\top \mathbf{V}_q + \text{Tr} \mathbf{V}_m^\top \mathbf{V} \mathbf{D} \mathbf{V}^\top \mathbf{V}_m) \right\} \\
&= c - \frac{n}{2} \left\{ \log \det \Psi + \sum_{j=1}^q \log \theta_j + \text{Tr} \mathbf{D}_q^{-1} \mathbf{D}_q + \text{Tr} \mathbf{D}_m \right\} \\
&= c - \frac{n}{2} \left\{ \log \det \Psi + \sum_{j=1}^q \log \theta_j + q + \text{Tr} \Psi^{-1} \mathbf{S} - \sum_{j=1}^q \theta_j \right\}.
\end{aligned} \tag{S14}$$

## S2 Additional results for simulation studies

### S2.1 Average CPU time

Table S1: Average CPU time (in seconds) of FAD and EM applied with 1-6 factors for randomly simulated datasets where true  $q = 3$ .

|                               |     | 1      | 2      | 3      | 4      | 5      | 6      |
|-------------------------------|-----|--------|--------|--------|--------|--------|--------|
| $(n, p, q) = (10^2, 10^3, 3)$ | FAD | 0.101  | 0.092  | 0.096  | 0.116  | 0.122  | 0.128  |
|                               | EM  | 2.494  | 2.519  | 3.076  | 2.012  | 2.075  | 2.162  |
| $(n, p, q) = (15^2, 15^3, 3)$ | FAD | 0.639  | 0.514  | 0.486  | 0.841  | 0.966  | 1.025  |
|                               | EM  | 24.798 | 22.885 | 27.906 | 16.822 | 16.630 | 15.722 |
| $(n, p, q) = (20^2, 20^3, 3)$ | FAD | 2.933  | 2.658  | 2.580  | 7.135  | 7.863  | 8.590  |
|                               | EM  | 57.052 | 57.527 | 81.463 | 49.689 | 48.508 | 49.504 |

Table S2: Average CPU time (in seconds) of FAD and EM applied with 1-10 factors for randomly simulated datasets where true  $q = 5$ .

|                               |     | 1      | 2      | 3      | 4      | 5      | 6      | 7      | 8      | 9      | 10     |
|-------------------------------|-----|--------|--------|--------|--------|--------|--------|--------|--------|--------|--------|
| $(n, p, q) = (10^2, 10^3, 5)$ | FAD | 0.102  | 0.095  | 0.096  | 0.096  | 0.094  | 0.119  | 0.124  | 0.128  | 0.134  | 0.137  |
|                               | EM  | 2.290  | 2.539  | 2.808  | 2.800  | 2.985  | 2.301  | 2.327  | 2.097  | 2.166  | 2.196  |
| $(n, p, q) = (15^2, 15^3, 5)$ | FAD | 0.667  | 0.513  | 0.501  | 0.507  | 0.497  | 0.828  | 0.919  | 1.039  | 1.108  | 1.143  |
|                               | EM  | 22.545 | 21.066 | 22.300 | 22.197 | 26.300 | 16.544 | 15.796 | 14.767 | 14.292 | 14.789 |
| $(n, p, q) = (20^2, 20^3, 5)$ | FAD | 2.937  | 2.687  | 2.553  | 2.583  | 2.590  | 7.114  | 8.167  | 9.238  | 10.426 | 11.157 |
|                               | EM  | 47.200 | 47.333 | 49.867 | 49.956 | 71.308 | 47.469 | 47.119 | 43.828 | 45.304 | 44.141 |

Table S3: Average CPU time (in seconds) of FAD and EM applied for data-driven models.

|                               |     | 1       | 2       | 3       | 4       | 5       | 6       | 7       | 8       |
|-------------------------------|-----|---------|---------|---------|---------|---------|---------|---------|---------|
| $(n, p, q) = (160, 24547, 2)$ | FAD | 5.007   | 4.222   | 10.835  | 13.636  | –       | –       | –       | –       |
|                               | EM  | 253.021 | 304.909 | 311.916 | 303.712 | –       | –       | –       | –       |
| $(n, p, q) = (180, 24547, 2)$ | FAD | 4.927   | 4.104   | 10.411  | 12.058  | –       | –       | –       | –       |
|                               | EM  | 287.824 | 345.504 | 331.919 | 314.723 | –       | –       | –       | –       |
| $(n, p, q) = (340, 24547, 4)$ | FAD | 6.645   | 7.121   | 7.449   | 6.688   | 22.294  | 26.575  | 31.109  | 34.208  |
|                               | EM  | 648.759 | 734.226 | 745.902 | 735.263 | 767.010 | 789.614 | 802.502 | 748.395 |

## S2.2 Estimation errors in parameters

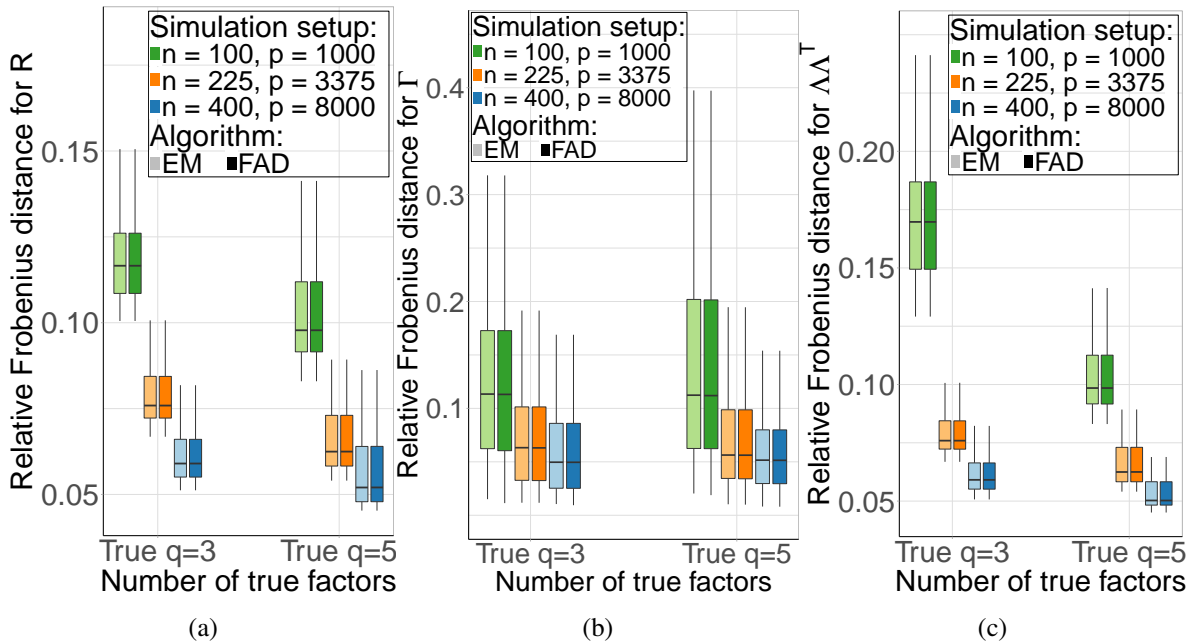

Figure S1: Relative Frobenius errors of FAD and EM for (a) correlation matrix  $\mathbf{R}$ , (b) signal matrix  $\mathbf{\Gamma}$  and (c)  $\mathbf{\Lambda\Lambda}^\top$  on randomly simulated cases, with lighter ones for EM and darker ones for FAD.

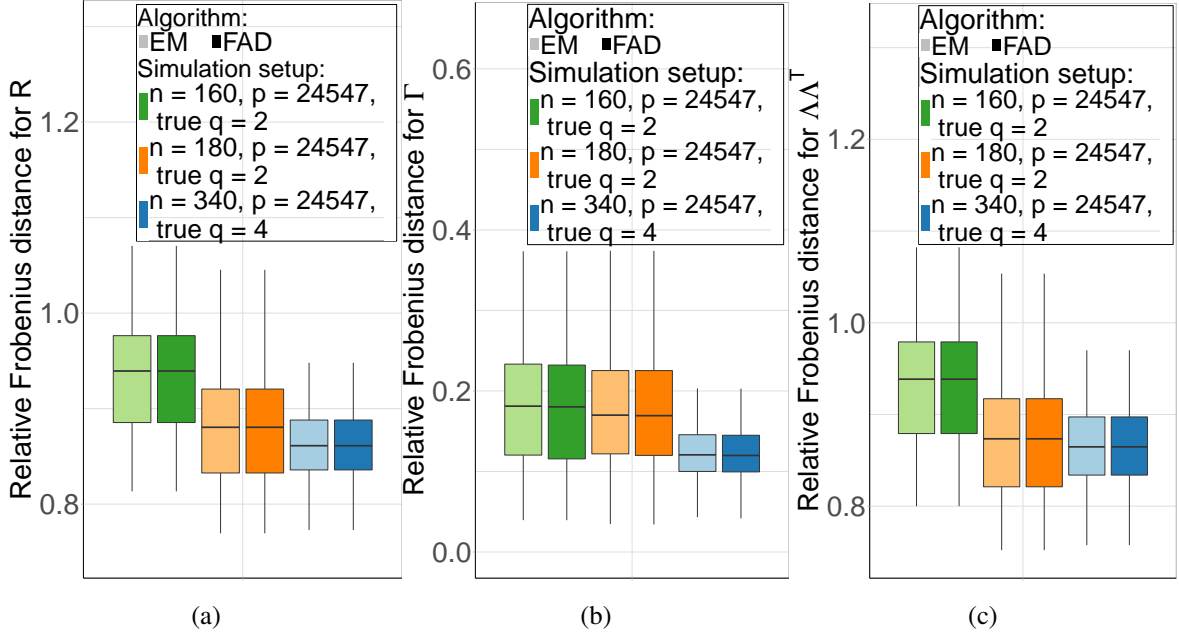

Figure S2: Relative Frobenius errors of FAD and EM for (a) correlation matrix  $R$ , (b) signal matrix  $\Gamma$  and (c)  $\Lambda\Lambda^\top$  on data-driven cases, with lighter ones for EM and darker ones for FAD.

### S2.3 Performance of FAD compared to EM for high-noise models

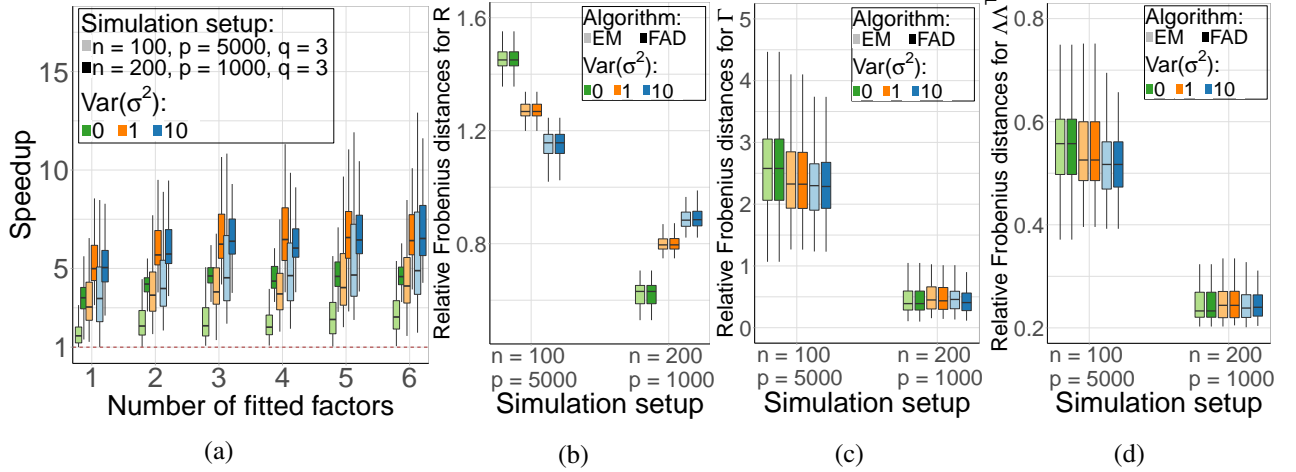

Figure S3: Relative speed of FAD to EM on dataset with high noise (a). Relative Frobenius errors of FAD and EM for (b) correlation matrix  $R$ , (c) signal matrix  $\Gamma$  and (d)  $\Lambda\Lambda^\top$ .

## References

Henderson, H. V. and Searle, S. R. (1981), “On deriving the inverse of a sum of matrices,” *SIAM Review*, **23**, 53–60.
